# Supplementary material for: Measurement report: Fast photochemical production of peroxyacetyl nitrate (PAN) over the rural North China Plain during haze events in autumn
Source: Copernicus journal article supplement (doi:10.5194/acp-21-17995-2021), 2021-12-09
Supplement: Supplementary file 1 [file acp-21-17995-2021-supplement.pdf]

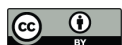

*Supplement of*

**Measurement report: Fast photochemical production of peroxyacetyl nitrate (PAN) over the rural North China Plain during haze events in autumn**

**Yulu Qiu et al.**

*Correspondence to:* Zhiqiang Ma (zqma@ium.cn)

The copyright of individual parts of the supplement might differ from the article licence.

### Method S1. Calculation of HO<sub>x</sub> production rates through three pathways

Photolysis of O<sub>3</sub>, HONO and HCHO are usually considered as the three major HO<sub>x</sub> sources during the daytime. Photolysis of HONO can directly produce OH radical and the production rate of HO<sub>x</sub> (P[HO<sub>x</sub>]<sub>HONO</sub>) is the product of photolysis rate and HONO concentration.

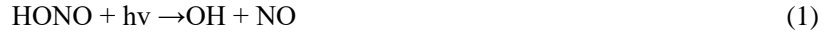

$$\text{P}[\text{HO}_x]_{\text{HONO}} = J_{\text{HONO}} \times [\text{HONO}] \quad (2)$$

O<sub>3</sub> photolysis can produce excited singlet oxygen atom (O(<sup>1</sup>D)), and O(<sup>1</sup>D) collides with N<sub>2</sub> or O<sub>2</sub>, quenching to its ground state or reacts with H<sub>2</sub>O to generate two OH radicals

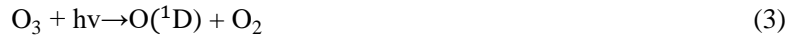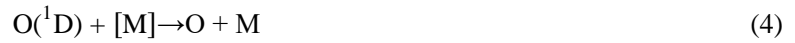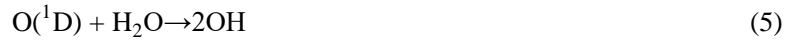

Following the estimation method in Seinfeld and Pandis (2006), the HO<sub>x</sub> production rate by O<sub>3</sub> photolysis could be derived by

$$\text{P}[\text{HO}_x]_{\text{O}_3} = \frac{2J_{\text{O}_3} \times k_4 \times [\text{H}_2\text{O}] \times [\text{O}_3]}{[\text{M}] \times k_3} \quad (6)$$

Photolysis of HCHO directly produces H and HCO. Because of the rapid reaction between HCO (H) and O<sub>2</sub>, HCHO photolysis could be represented as

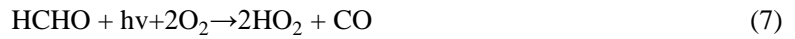

and the production rate of HO<sub>x</sub> is calculated by

$$\text{P}[\text{HO}_x]_{\text{HCHO}} = 2J_{\text{HCHO}} \times [\text{HCHO}] \quad (8)$$

## Method S2. Calculation of PA radical concentration and PAN production rate

In this study, we estimate PA radical concentration and also obtain PAN production rate in another way. As shown in Section 3, PA radical is usually formed through the reaction between CH<sub>3</sub>CHO and OH (9), and the major sinks of PA are reactions between NO<sub>2</sub> (10) and NO (11).

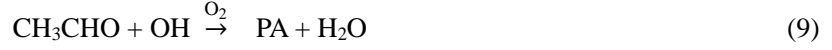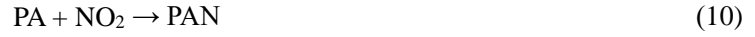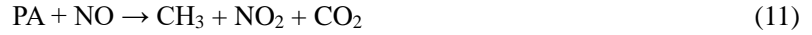

Since PA is rather reactive, it may reach steady state and thereby we assume that the rate of PA formation is equal to the rate of loss. Thus, PA radical concentration can be calculated by:

$$[\text{PA}] = \frac{k_1[\text{CH}_3\text{CHO}][\text{OH}]}{k_2[\text{NO}_2] + k_3[\text{NO}]} \quad (12)$$

where  $k_1 = 5.55 \times 10^{-12} \exp(311/T)$ ,  $k_3 = 8.1 \times 10^{-12} \exp(270/T)$ ,  $k_2 = \left[ \frac{k_0[\text{M}]}{1 + \frac{k_0[\text{M}]}{k_{\infty}}} \right] \text{Fl}^{\left[ \frac{1}{1 + \left[ \log_{10} \left( \frac{k_0[\text{M}]}{k_{\infty}} \right) \right]^2} \right]}$ ,  $k_0 = 9.7 \times 10^{-29} (T/300)^{-5.6}$ ,  $k_{\infty} = 9.3 \times 10^{-12} (T/300)^{1.5}$ ,  $F = 0.6$ , following the reaction coefficients in Seinfeld and Pandis (2006). OH

concentration is assumed to be with a maximum value of  $3.0 \times 10^6$  molec cm<sup>-3</sup> at noon, which is consistent with Lu et al. (2019). Therefore, PAN production rate can be estimated by  $k_2[\text{PA}][\text{NO}_2]$ .

**Table S1.** Detailed parameters of instruments used in this study.

| Species                 | Instruments    | Time resolution | Detection limit       | Calibration frequency |
|-------------------------|----------------|-----------------|-----------------------|-----------------------|
| PAN                     | GC-ECD         | 5 mins          | 20 ppt                | monthly               |
| VOCs                    | PTR-ToF-MS     | 5 mins          | -                     | monthly               |
| HONO                    | LOPAP          | 1 min           | 10 ppt                | weekly                |
| O <sub>3</sub>          | TE 49i         | 1 min           | 0.5 ppb               | monthly               |
| NO <sub>x</sub>         | TE 42i         | 1 min           | 50 ppt                | monthly               |
| CO                      | Picarro, G2401 | 2 secs          | 40 ppb                | monthly               |
| PM <sub>2.5</sub>       | TEOM 1405      | 5 mins          | 0.1 µg/m <sup>3</sup> | -                     |
| Photolysis ( <i>J</i> ) | PFS-100        | 1 min           | -                     | quarterly             |

**Table S2.** Comparisons of PAN levels in recent studies in China with results in this study.

| Location                       | Site type       | Period                            | Conc.<br>(ppb) | Reference           |
|--------------------------------|-----------------|-----------------------------------|----------------|---------------------|
| Jinan, Shandong, China         | Urban NCP       | Nov 2015–Jul 2016                 | 1.89±1.42      | Liu et al. (2018)   |
| Tianjin, China                 | Suburban NCP    | Sep 5–28, 2018                    | 0.93±0.57      | Qiu et al. (2019a)  |
| PKU, Beijing, China            | Urban NCP       | Jun–Jul, 2014                     | 1.5            | Zhang et al. (2017) |
| Wangdu, Hebei, China           | Rural NCP       | Jun–Jul, 2014                     | 1.7            | Zhang et al. (2017) |
| Beijing, China                 | Suburban NCP    | Jan–Feb, 2016                     | 1.04           | Zhang et al. (2019) |
| CS, Chongqing, China           | Urban site      | Aug 25–Sep 10, 2015               | 2.05           | Sun et al. (2020)   |
| NQ, Chongqing, China           | Suburban site   | Aug 25–Sep 10, 2015               | 1.08           | Sun et al. (2020)   |
| Xiamen, Fujian, China          | Suburban site   | Jan–Dec, 2018                     | 0.55           | Hu et al. (2020)    |
| Hongkong, China                | Suburban site   | Oct–Nov, 2016                     | 0.63±0.05      | Zeng et al. (2019a) |
| Ziyang, Sichuan, China         | Suburban site   | Dec, 2012                         | 0.55           | Zhu et al. (2018)   |
| Central Tibetan Plateau, China | Background site | Aug17–24, 2011<br>May 15–Jul 2012 | 0.36<br>0.44   | Xu et al. (2018)    |
| SDZ, Beijing, China            | Rural NCP       | Oct, 2020                         | 1.11±0.88      | This study          |

**Table S3.** Comparisons between estimated reaction rates through HO<sub>2</sub>+NO and HO<sub>2</sub>+HO<sub>2</sub> during pollution days at the SDZ site.

|                                  | $k^a$<br>(cm <sup>3</sup> molec <sup>-1</sup> s <sup>-1</sup> ) | HO <sub>2</sub> <sup>b</sup><br>(molec cm <sup>-3</sup> ) | NO or HO <sub>2</sub><br>(molec cm <sup>-3</sup> ) | Reaction rates <sup>c</sup><br>(molec cm <sup>-3</sup> s <sup>-1</sup> ) |
|----------------------------------|-----------------------------------------------------------------|-----------------------------------------------------------|----------------------------------------------------|--------------------------------------------------------------------------|
| HO <sub>2</sub> +NO              | $8.4 \times 10^{-12}$                                           | $\sim 10^8$                                               | $7.1 \times 10^9$ for NO                           | $\sim 6 \times 10^6$                                                     |
| HO <sub>2</sub> +HO <sub>2</sub> | $3.3 \times 10^{-12}$                                           | $\sim 10^8$                                               | $\sim 10^8$ for HO <sub>2</sub>                    | $\sim 3.3 \times 10^4$                                                   |
| R1/R2                            | 2.5                                                             | 1                                                         | $\sim 71$                                          | $\sim 1.8 \times 10^2$                                                   |

<sup>a</sup>.  $k$  denotes the reaction coefficients of HO<sub>2</sub>+NO ( $k_{\text{NO}}$ ) and HO<sub>2</sub>+HO<sub>2</sub> ( $k_{\text{HO}_2}$ ).

<sup>b</sup>. The HO<sub>2</sub> concentration is assumed to be with a magnitude of  $10^8$  molec cm<sup>-3</sup>, which is consistent with Tan et al. (2018).

<sup>c</sup>. The reaction rates of HO<sub>2</sub>+NO and HO<sub>2</sub>+HO<sub>2</sub> are calculated by  $k_{\text{NO}} [\text{HO}_2][\text{NO}]$  and  $k_{\text{HO}_2} [\text{HO}_2][\text{HO}_2]$ , respectively.

**Table S4.** Comparisons of HCHO levels in recent studies in China with our result.

| Location                    | Site type       | Period                      | Conc. (ppb)  | Reference           |
|-----------------------------|-----------------|-----------------------------|--------------|---------------------|
| Beijing, China              | Suburban NCP    | Summer, 2008                | 11.17 ± 5.32 | Yang et al. (2018)  |
| Beijing, China              | Suburban NCP    | October, 2006               | 7.49         | Pang et al. (2009)  |
| Beijing, China              | Urban NCP       | Summer, 2013                | 11.4 ± 5.6   | Rao et al. (2016)   |
|                             |                 | Winter, 2014                | 5.5 ± 3.9    |                     |
| Beijing, China              | Urban NCP       | Summer, 2015                | 6.9 ± 2.9    | Qian et al. (2019)  |
|                             |                 | Summer, 2018                | 8.5 ± 2.1    |                     |
|                             |                 | Winter, 2017                | 3.2 ± 2.4    |                     |
| Beijing, China              | Urban NCP       | August, 2006                | 29.2 ± 12.1  | Duan et al. (2012)  |
| Beijing, China              | Urban NCP       | December, 2016              | 18.3 ± 7.2   | Sheng et al. (2018) |
| Beijing, China              | Suburban NCP    | Autumn, 2005                | 15.8 ± 9.7   | Zhang et al. (2012) |
|                             |                 | Autumn, 2008                | 5.9 ± 3.2    |                     |
|                             |                 | Autumn, 2009                | 8.3 ± 5.8    |                     |
| Beijing, China              | Urban NCP       | November, 2014              | 14.2 ± 13.8  | Zhou et al. (2019)  |
|                             |                 | July, 2015                  | 12.8 ± 4.8   |                     |
| Wangdu, China               | Rural NCP       | Nov–Dec, 2017               | 3.7          | Wang et al. (2020)  |
| Shenzhen, Guangdong, China  | Urban site      | Spring, 2016                | 3.4 ± 1.6    | Wang et al. (2017)  |
|                             |                 | Summer, 2016                | 5.0 ± 4.4    |                     |
|                             |                 | Autumn, 2016                | 5.1 ± 3.1    |                     |
|                             |                 | Winter, 2016                | 4.2 ± 2.2    |                     |
| Wujiasha, China             | Suburban site   | August, 2016                | 2.1 ± 0.2    | Zeng et al. (2019b) |
| Ziyang, Sichuan, China      | Urban site      | August, 2016                | 2.2 ± 0.4    |                     |
| Hankou, Hubei, China        | Roadside site   | August, 2016                | 3.4 ± 0.5    |                     |
| Nanning, Guangxi, China     | Urban site      | Oct 2011–Jul 2012           | 5.6 ± 2.8    | Guo et al. (2016)   |
| Mount Tai, Shandong, China  | Background site | Summer, 2014                | 3.5 ± 1.0    | Yang et al. (2017)  |
| Wuhan, Hubei, China         | Suburban site   | Feb, Apr, July, Oct of 2017 | 3.4 ± 2.0    | Yang et al.(2019)   |
| Guangzhou, Guangdong, China | Urban site      | July, 2006                  | 7.6 ± 3.7    | Ling et al. (2017)  |
| SDZ, Beijing, China         | Rural site      | Oct., 2020                  | 4.6 ± 3.8    | This study          |

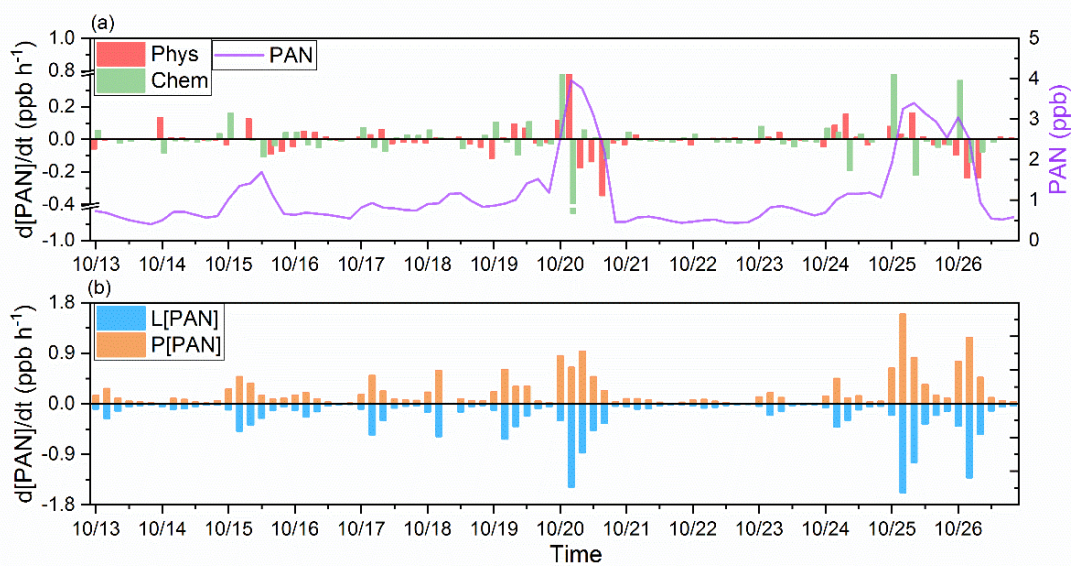

**Figure S1.** (a) Changes in PAN concentrations every four hours due to physical (Phys) and chemical (Chem) processes during the observation period at the SDZ site. (b) Chemical change rates of PAN due to chemical production (P[PAN]) and loss (L[PAN]) rates every four hours during the observation period at the SDZ site.



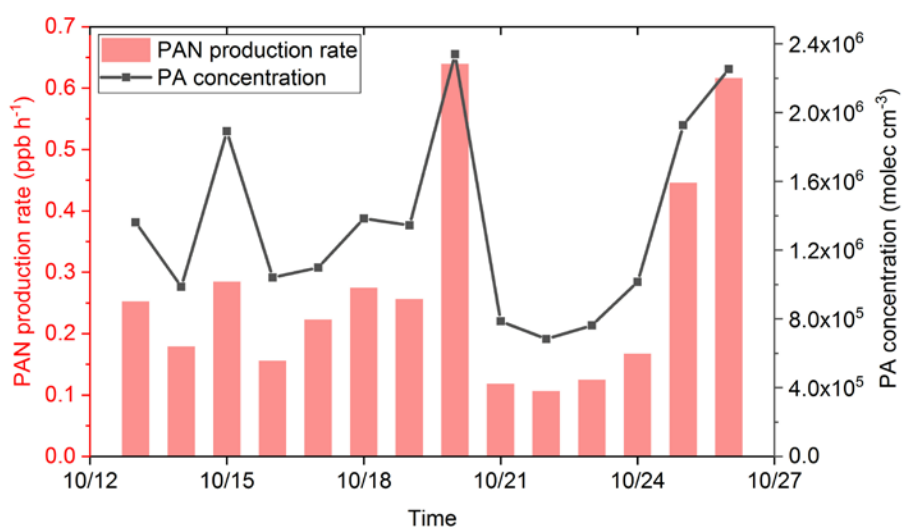

**Figure S2.** Time series of calculated PAN production rates (ppb h<sup>-1</sup>) through reaction between PA radical and NO<sub>2</sub> and PA concentrations (molec cm<sup>-3</sup>) at the SDZ site on the mornings of the observation period.
